# Supplementary material for: Highly active tin(iv) phosphate phase transfer catalysts for the production of lactic acid from triose sugars
Source: Royal Society of Chemistry journal article supplement (doi:10.1039/c5cy00647c), 2015-01-01
Supplement: c5cy00647c1.pdf [file c5cy00647c1.pdf]

## Supporting Information

### Catalysis Science & Technology

# Highly active tin (IV) phosphate phase transfer catalysts for the production of lactic acid from triose sugars

Xincheng Wang,<sup>a</sup> Fengbing Liang,<sup>b</sup> Chongpin Huang,\*<sup>a</sup> Yingxia Li,<sup>a</sup> and Biaohua Chen<sup>a</sup>

<sup>a</sup> State Key Laboratory of Chemical Resource Engineering, Beijing University of Chemical Technology, Beijing 100029, China. Fax: 86 10 6441 9619; Tel: 86 10 6441 2054;

E-mail: huangcp@mail.buct.edu.cn

<sup>b</sup> CAS Key Laboratory of Biobased Materials, Qingdao Institute of Bioenergy and Bioprocess Technology, Chinese Academy of Sciences, Qingdao 266101, China.

## Table of Contents

### Tables:

**Table S1** Catalytic conversion of GLA to LA by tin materials with various surfactants.

**Table S2** Initial rates of reaction using tin materials with various surfactants.

**Table S3** Initial rates of reaction using tin materials with various surfactants.

**Table S4** Characterization of the recycled SnP-PEG2000 by adsorption and TGA analysis.

**Table S5** Conversion of DHA to LA catalyzed by Sn-Beta with additional PEG2000.

**Table S6** Catalytic conversion of DHA to LA by tin materials with various surfactants.

**Table S7** Catalytic conversion of DHA to LA by 20 mg SnP-PEG2000 over prolonged reaction times.

**Table S8** Formula or structure of the surfactants.

**Table S9** Characterization of the tin materials with various surfactants by adsorption.

**Table S10** Solubility studies of SnP-PEG2000 in water/surfactant mixtures.

### Figures:

**Fig. S1** Wide angle PXRD pattern for the as-synthesized and calcined SnP-PEG2000.

**Fig. S2** Small angle PXRD pattern for the as-synthesized and calcined SnP-PEG2000.

**Fig. S3** TEM images of the a) as-synthesized and b) calcined SnP-PEG2000.

**Fig. S4** The results of DHA conversion after a prolonged reaction time of 6 h.

**Fig. S5** HPLC chromatogram of the aqueous phase obtained from the hydrothermal treatment of GLA.

**Fig. S6** Small angle PXRD pattern for the calcined SnP with varying surfactants.

**Fig. S7** TGA of calcined SnP with surfactants and corresponding weight loss ratio.

**Fig. S8** TGA analysis of the calcined (a) and as-synthesized (b) SnP-PEG2000 and PEG 2000 during three consecutive runs.

**Scheme S1** Postulated roles of SnP-PEG2000 during the conversion of DHA into LA.

**Table S1** Catalytic conversion of GLA to LA by tin materials with various surfactants. ( $[GLA]_0=0.3125$  M; Catalyst=80 mg; T= 140 °C; t=15 min).

| Entry | Catalyst                             | As-synthesized |         |        |        | Calcined      |         |        |        |
|-------|--------------------------------------|----------------|---------|--------|--------|---------------|---------|--------|--------|
|       |                                      | GLA Conv. (%)  | DHA (%) | PA (%) | LA (%) | GLA Conv. (%) | DHA (%) | PA (%) | LA (%) |
| 1     | Blank                                | 75.88          | 14.12   | 4.39   | 3.27   | -             | -       | -      | -      |
| 2     | H <sub>3</sub> PO <sub>4</sub>       | 54.86          | 4.62    | 47.71  | 2.52   | -             | -       | -      | -      |
| 3     | SnCl <sub>4</sub> ·5H <sub>2</sub> O | 90.17          | 22.40   | 64.23  | 3.54   | -             | -       | -      | -      |
| 4     | SnP                                  | 91.12          | 15.26   | 64.71  | 11.15  | 74.49         | 20.93   | 46.75  | 6.81   |
| 5     | SnP-IMEP                             | 83.63          | 24.43   | 49.63  | 9.57   | 86.74         | 20.70   | 58.37  | 7.67   |
| 6     | SnP-P123                             | 98.14          | 4.24    | 69.25  | 24.65  | 91.85         | 17.45   | 63.76  | 10.64  |
| 7     | SnP-P123 <sup>a</sup>                | 98.53          | 3.65    | 68.14  | 24.32  | 90.91         | 17.52   | 64.31  | 9.58   |
| 8     | SnP-F127                             | 97.95          | 5.89    | 69.24  | 22.82  | 84.65         | 22.35   | 56.60  | 5.71   |
| 9     | SnP-PEG2000                          | 95.48          | 11.70   | 66.46  | 17.33  | 67.61         | 20.91   | 41.66  | 5.04   |
| 10    | SnP-NHD                              | 95.79          | 9.07    | 70.11  | 16.61  | 66.11         | 27.28   | 31.85  | 6.98   |
| 11    | SnP-CD                               | 93.79          | 12.01   | 67.58  | 14.20  | 84.01         | 23.72   | 50.36  | 9.93   |
| 12    | SnP-TBAB                             | 95.45          | 8.30    | 69.56  | 17.59  | 79.52         | 19.62   | 51.25  | 8.65   |
| 13    | SnP-CTAB                             | 95.48          | 14.77   | 60.17  | 20.54  | 96.81         | 9.03    | 68.89  | 18.89  |
| 14    | SnO <sub>2</sub>                     | -              | -       | -      | -      | 87.98         | 23.01   | 2.60   | 4.24   |
| 15    | Sn-Beta                              | -              | -       | -      | -      | 65.52         | 34.80   | 17.44  | 3.02   |

<sup>a</sup> Large-pore mesoporous SnP.**Table S2** Initial rates of reaction using tin materials with various surfactants.( $[DHA]_0=0.3125$  M; Catalyst=80 mg; T= 140 °C).

| Entry | Catalyst                             | As-synthesized |     |     | Calcined |     |     |
|-------|--------------------------------------|----------------|-----|-----|----------|-----|-----|
|       |                                      | DHA            | PA  | LA  | DHA      | PA  | LA  |
| 1     | Blank                                | 13             | 6   | 6   | -        | -   | -   |
| 2     | H <sub>3</sub> PO <sub>4</sub>       | 267            | 214 | 11  | -        | -   | -   |
| 3     | SnCl <sub>4</sub> ·5H <sub>2</sub> O | 290            | 228 | 46  | -        | -   | -   |
| 4     | SnP                                  | 530            | 410 | 86  | 489      | 366 | 73  |
| 5     | SnP-IMEP                             | 493            | 375 | 82  | 560      | 441 | 82  |
| 6     | SnP-P123                             | 786            | 567 | 177 | 696      | 530 | 127 |
| 7     | SnP-P123 <sup>a</sup>                | 799            | 551 | 183 | 713      | 511 | 127 |
| 8     | SnP-F127                             | 728            | 542 | 147 | 570      | 443 | 87  |
| 9     | SnP-PEG2000                          | 725            | 539 | 148 | 341      | 258 | 56  |
| 10    | SnP-NHD                              | 808            | 572 | 197 | 332      | 247 | 60  |
| 11    | SnP-CD                               | 766            | 555 | 173 | 499      | 385 | 81  |
| 12    | SnP-TBAB                             | 686            | 514 | 133 | 456      | 343 | 80  |
| 13    | SnP-CTAB                             | 453            | 342 | 76  | 705      | 535 | 128 |
| 14    | SnO <sub>2</sub>                     | -              | -   | -   | 65       | 36  | 22  |
| 15    | Sn-Beta                              | -              | -   | -   | 375      | 71  | 165 |

<sup>a</sup> Large-pore mesoporous SnP, Data are given in units of  $[\mu\text{mol g}_{\text{cat}}^{-1} \text{min}^{-1}]$ .

**Table S3** Initial rates of reaction using tin materials with various surfactants.([PA]<sub>0</sub>=0.3125 M; Catalyst=80 mg; T= 140 °C).

| Entry | Catalyst                             | As-synthesized |     | Calcined |     |
|-------|--------------------------------------|----------------|-----|----------|-----|
|       |                                      | PA             | LA  | PA       | LA  |
| 1     | Blank                                | 27             | 8   | -        | -   |
| 2     | H <sub>3</sub> PO <sub>4</sub>       | 23             | 10  | -        | -   |
| 3     | SnCl <sub>4</sub> ·5H <sub>2</sub> O | 231            | 125 | -        | -   |
| 4     | SnP                                  | 171            | 136 | 227      | 114 |
| 5     | SnP-IMEP                             | 224            | 156 | 217      | 140 |
| 6     | SnP-P123                             | 225            | 134 | 183      | 134 |
| 7     | SnP-P123 <sup>a</sup>                | 223            | 134 | 193      | 139 |
| 8     | SnP-F127                             | 327            | 262 | 220      | 131 |
| 9     | SnP-PEG2000                          | 259            | 213 | 106      | 65  |
| 10    | SnP-NHD                              | 290            | 227 | 160      | 74  |
| 11    | SnP-CD                               | 261            | 215 | 241      | 142 |
| 12    | SnP-TBAB                             | 118            | 109 | 222      | 108 |
| 13    | SnP-CTAB                             | 314            | 239 | 299      | 230 |
| 14    | SnO <sub>2</sub>                     | -              | -   | 70       | 22  |
| 15    | Sn-Beta                              | -              | -   | 613      | 589 |

<sup>a</sup> Large-pore mesoporous SnP, Data are given in units of [ $\mu\text{mol g}_{\text{cat}}^{-1} \text{min}^{-1}$ ].**Table S4** Characterization of the recycled SnP-PEG2000 by adsorption and TGA analysis.

| SnP-PEG2000    | Run | BET surface area                  | Total acid sites        | Weight loss | Carbon deposition |
|----------------|-----|-----------------------------------|-------------------------|-------------|-------------------|
|                |     | (m <sup>2</sup> g <sup>-1</sup> ) | (mmol g <sup>-1</sup> ) | (%)         | (%)               |
| As-synthesized | 1   | 165.3                             | 1.36                    | 8.6         | -                 |
|                | 2   | 162.5                             | 1.33                    | 9           | 0.4               |
|                | 3   | 160.3                             | 1.3                     | 9.3         | 0.7               |
| Calcined       | 1   | 290.3                             | 0.83                    | 3.5         | -                 |
|                | 2   | 285.6                             | 0.8                     | 4.8         | 1.3               |
|                | 3   | 283.8                             | 0.79                    | 5           | 1.5               |

**Table S5** Conversion of DHA to LA catalyzed by Sn-Beta with additional PEG2000.([DHA]<sub>0</sub>=0.3125 M; Sn-Beta=80 mg; T= 140 °C; time=4 h).

| Entry | PEG2000 (mg) | DHA Conv. (%) | LA (%) |
|-------|--------------|---------------|--------|
| 1     | 0            | 98.0          | 91.3   |
| 2     | 5            | 97.5          | 92.6   |
| 3     | 10           | 97.8          | 91.7   |
| 4     | 15           | 98.1          | 93.1   |
| 5     | 20           | 96.9          | 92.4   |

**Table S6** Catalytic conversion of DHA to LA by tin materials with various surfactants. ( $[DHA]_0=0.3125$  M; Catalyst=80 mg; T=140 °C; t=15 min).

| Entry | Catalyst              | As-synthesized |              |              | Calcined      |              |              |
|-------|-----------------------|----------------|--------------|--------------|---------------|--------------|--------------|
|       |                       | DHA Conv. (%)  | PA Yield (%) | LA Yield (%) | DHA Conv. (%) | PA Yield (%) | LA Yield (%) |
| 1     | SnP                   | 57.2           | 46.8         | 8.8          | 52.8          | 41.7         | 7.5          |
| 2     | SnP-IMEP              | 53.1           | 42.7         | 8.4          | 60.4          | 50.2         | 8.4          |
| 3     | SnP-P123              | 84.8           | 64.5         | 18.2         | 75.1          | 60.3         | 12.9         |
| 4     | SnP-P123 <sup>a</sup> | 86.2           | 62.8         | 18.7         | 76.9          | 58.3         | 13.1         |
| 5     | SnP-F127              | 78.6           | 61.7         | 15.1         | 61.5          | 50.5         | 8.9          |
| 6     | SnP-PEG2000           | 78.3           | 61.4         | 15.2         | 36.8          | 29.4         | 5.8          |
| 7     | SnP-NHD               | 87.2           | 65.2         | 20.3         | 35.8          | 28.1         | 6.2          |
| 8     | SnP-CD                | 82.2           | 62.9         | 17.3         | 53.9          | 43.9         | 8.3          |
| 9     | SnP-TBAB              | 73.9           | 58.6         | 13.6         | 49.2          | 39.1         | 8.2          |
| 10    | SnP-CTAB              | 48.9           | 38.9         | 7.8          | 76.1          | 60.9         | 13.1         |
| 11    | Sn-Beta               | -              | -            | -            | 23.2          | 4.1          | 13.6         |

<sup>a</sup> Large-pore mesoporous SnP.

**Table S7** Catalytic conversion of DHA to LA by 20 mg SnP-PEG2000 over prolonged reaction times. ( $[DHA]_0=0.3125$  M; T= 140 °C).

| Entry | Time (h) | DHA Conv. (%) | LA Yield (%) |
|-------|----------|---------------|--------------|
| 1     | 8        | >99           | 55.9         |
| 2     | 10       | >99           | 56.7         |
| 3     | 12       | >99           | 57.1         |

In order to further investigate the increasing trend of LA yields when 20 mg catalysts were used, further experiments were conducted under similar reaction conditions and results are shown in Table S4. The yield of LA increased only slightly at prolonged reaction times and plateaued at 57%. One possible explanation is that the formation of LA over long reaction times resulted in a strong Brønsted acid environment, facilitating the conversion of PA to undesirable byproducts when the catalyst loading was low.

**Table S8** Formula or structure of the surfactants.

| Entry | Surfactant | Formula or Structure                                                                |
|-------|------------|-------------------------------------------------------------------------------------|
| 1     | P123       | PEO <sub>20</sub> PPO <sub>70</sub> PEO <sub>20</sub>                               |
| 2     | F127       | PEO <sub>106</sub> PPO <sub>70</sub> PEO <sub>106</sub>                             |
| 3     | PEG        | HO-(CH <sub>2</sub> CH <sub>2</sub> O) <sub>n</sub> -H                              |
| 4     | NHD        | H <sub>3</sub> CO-(CH <sub>2</sub> CH <sub>2</sub> O) <sub>n</sub> -CH <sub>3</sub> |
| 5     | CD         | 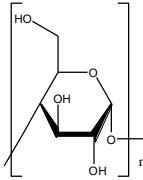   |
| 6     | TBAB       |    |
| 7     | CTAB       |    |
| 8     | PVP        |    |
| 9     | IMEP       |  |

PEO: -(CH<sub>2</sub>CH<sub>2</sub>O)<sub>n</sub>-;PPO: -(CH<sub>2</sub>CH<sub>2</sub>CH<sub>2</sub>O)<sub>n</sub>-**Table S9** Characterization of the tin materials with various surfactants by adsorption.

| Entry | Catalyst              | As-synthesized                                        |                                                          | Calcined                                              |                                                          |
|-------|-----------------------|-------------------------------------------------------|----------------------------------------------------------|-------------------------------------------------------|----------------------------------------------------------|
|       |                       | BET surface area<br>(m <sup>2</sup> g <sup>-1</sup> ) | Total acid sites<br>(mmol g <sup>-1</sup> ) <sup>b</sup> | BET surface area<br>(m <sup>2</sup> g <sup>-1</sup> ) | Total acid sites<br>(mmol g <sup>-1</sup> ) <sup>b</sup> |
| 1     | SnP                   | 146                                                   | 0.75                                                     | 168                                                   | 0.67                                                     |
| 2     | SnP-IMEP              | 121                                                   | 0.82                                                     | 235                                                   | 0.71                                                     |
| 3     | SnP-P123              | 137                                                   | 1.09                                                     | 196                                                   | 1.12                                                     |
| 4     | SnP-P123 <sup>a</sup> | 149                                                   | 1.28                                                     | 218.                                                  | 1.19                                                     |
| 5     | SnP-F127              | 132                                                   | 1.33                                                     | 162                                                   | 1.03                                                     |
| 6     | SnP-PEG2000           | 170                                                   | 1.39                                                     | 287                                                   | 0.82                                                     |
| 7     | SnP-NHD               | 175                                                   | 1.25                                                     | 215                                                   | 0.75                                                     |
| 8     | SnP-CD                | 158                                                   | 1.17                                                     | 221                                                   | 0.87                                                     |
| 9     | SnP-TBAB              | 139                                                   | 1.31                                                     | 183                                                   | 0.92                                                     |
| 10    | SnP-CTAB              | 123                                                   | 0.94                                                     | 265                                                   | 0.73                                                     |

<sup>a</sup> Large-pore mesoporous SnP, <sup>b</sup> Determined from ammonia TPD.

**Table S10** Solubility studies of SnP-PEG2000 in water/surfactant mixtures.

| SnP-PEG2000    | Water (mL) | Surfactant (mg) | Weight loss (wt %) |
|----------------|------------|-----------------|--------------------|
| As-synthesized | 8          | 0               | 0.7                |
|                | 8          | 5               | 1.3                |
|                | 8          | 10              | 1.0                |
|                | 8          | 20              | 0.9                |
|                | 8          | 30              | 0.6                |
| Calcined       | 8          | 0               | 0.9                |
|                | 8          | 5               | 1.1                |
|                | 8          | 10              | 1.3                |
|                | 8          | 20              | 0.8                |
|                | 8          | 30              | 0.7                |

The solubility test of the SnP-PEG2000 (with and without calcination) was performed in water and water/surfactant mixtures. 500 mg of the materials were added to 8 mL water or surfactant solutions with varying mass. Then the mixture was subjected to filtration after magnetic stirring for 4 h and the wet filter paper was put in vacuum oven overnight. Both the weight of the filter paper and the dried weight of filter plus catalysts were measured during the period. The residue was obtained in this way and the mass loss was then calculated (Table S9).

A slight weight loss (approximately 1%) was observed when the as-synthesized SnP-PEG2000 was recovered from pure water or water/surfactant mixtures. A decreased mass loss ratio was obtained with the addition of incremental PEG2000, indicating the deposition of surfactant on the catalyst surface. A similar trend was observed with the calcined materials. The weight loss could be considered as an overall effect of 1) inevitable loss during filtration, 2) catalyst dissolution and 3) dissolution or deposition of surfactants. It is tough work to study the effect of each factor; however, the deposition of surfactants could be excluded because the current system did not need additional surfactants. Moreover, the SnP exhibited high hydrolytic stability in acid media; this is beneficial for the current acid catalyzed reaction.<sup>S1</sup>

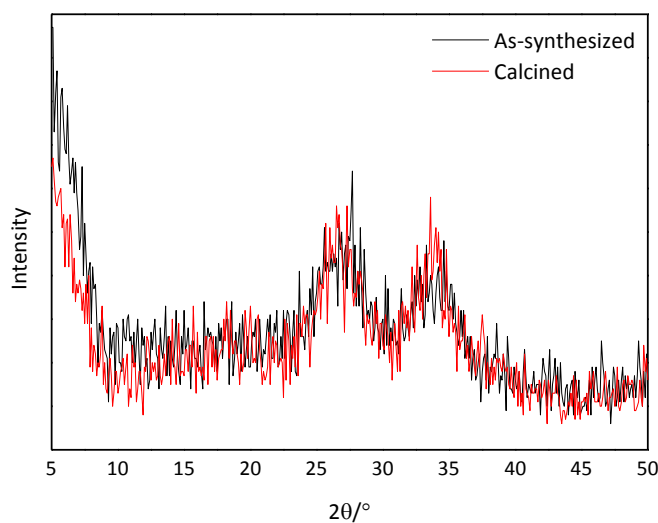**Fig. S1** Wide angle PXRD pattern for the as-synthesized and calcined SnP-PEG2000.

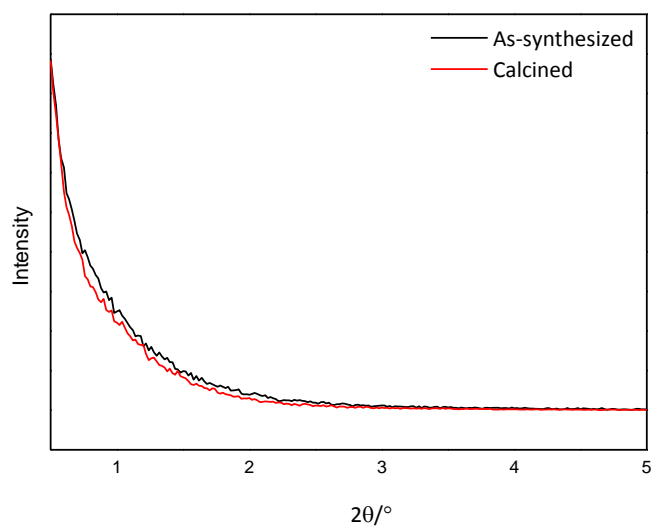

**Fig. S2** Small angle PXRD pattern for the as-synthesized and calcined SnP-PEG2000.

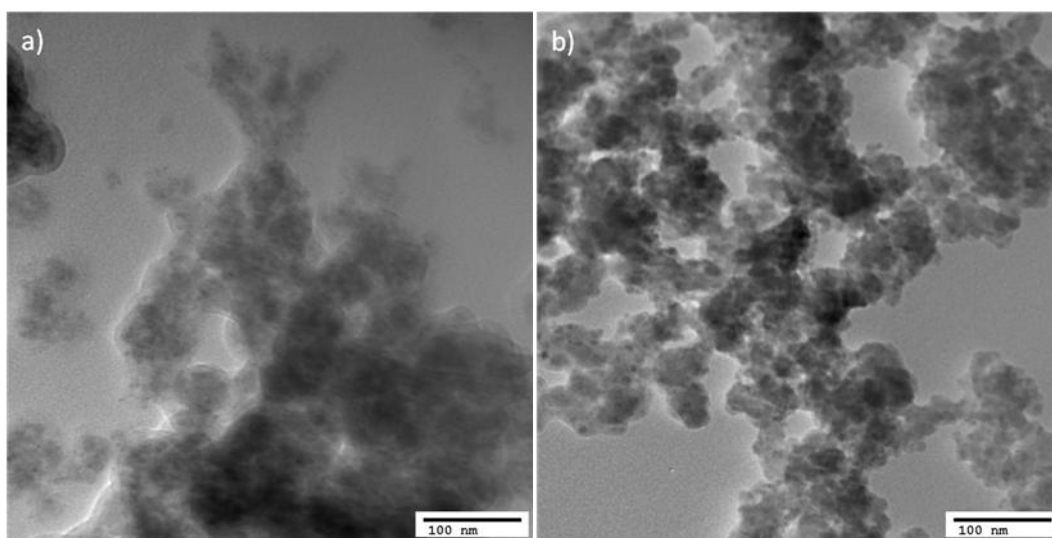

**Fig. S3** TEM images of the a) as-synthesized and b) calcined SnP-PEG2000.

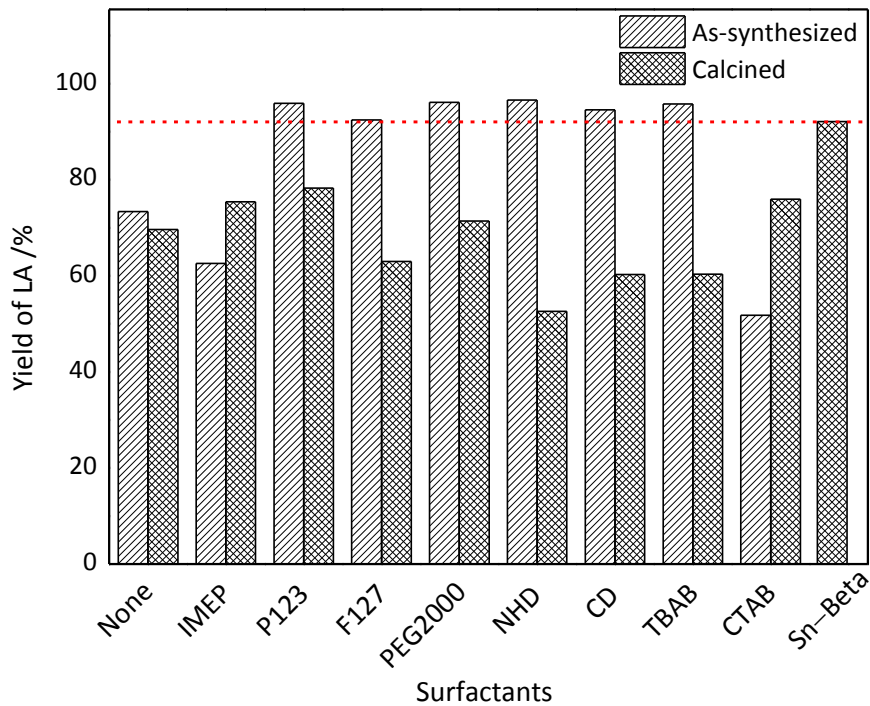

**Fig. S4** The results of DHA conversion after a prolonged reaction time of 6 h (Conditions: 0.3125 M DHA, 80 mg SnP Catalyst, 140 °C, 6 h). Sn-Beta, which is one of the state-of-the-art catalysts, was used as a reference.

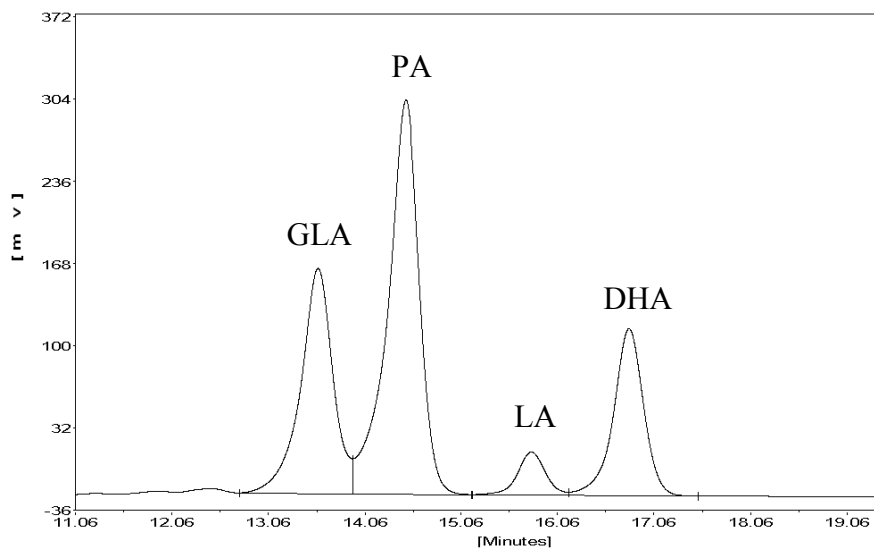

**Fig. S5** HPLC chromatogram of the aqueous phase obtained from the hydrothermal treatment of GLA (conditions: 0.3125 M GLA, 80 mg SnP-PEG2000, 140 °C; reaction time: 5 min).



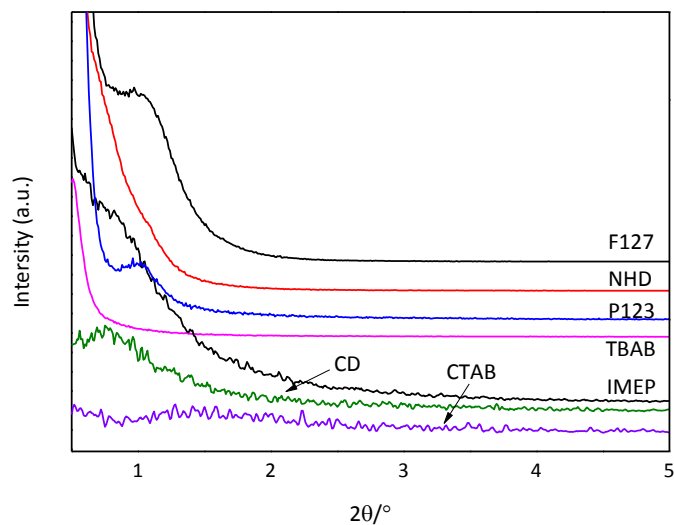

Fig. S6 Small angle PXRD pattern for the calcined SnP with varying surfactants.

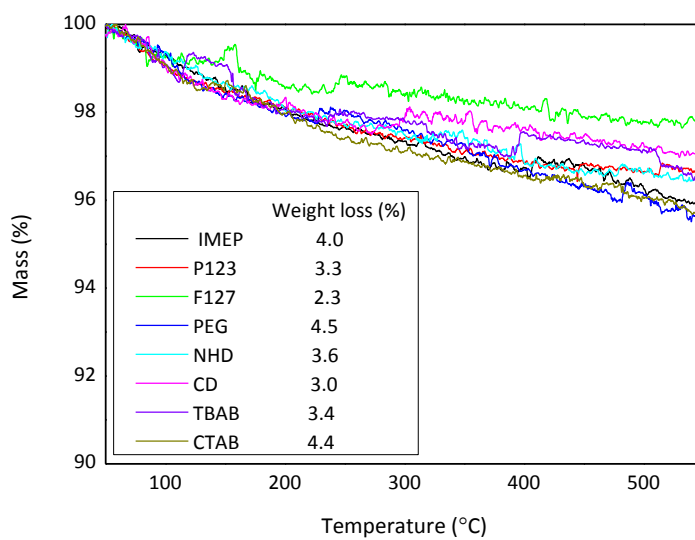

Fig. S7 TGA of calcined SnP with surfactants and corresponding weight loss ratio.

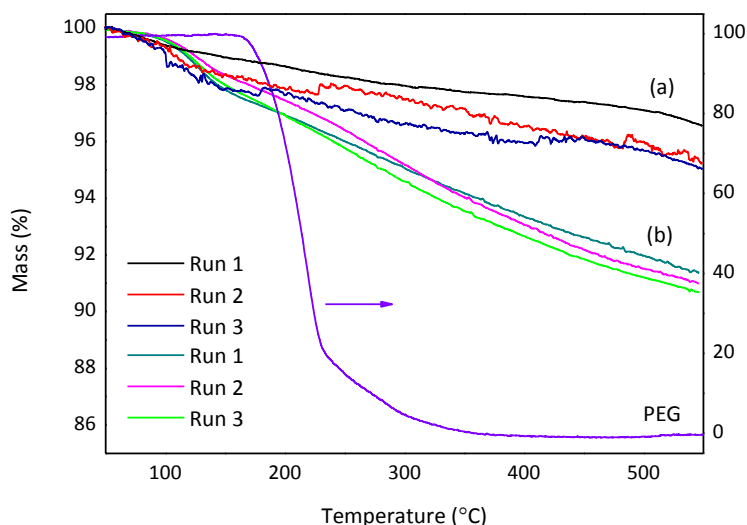

**Fig. S8** TGA analysis of the calcined (a) and as-synthesized (b) SnP-PEG2000 and PEG 2000 during three consecutive runs.

The TGA analysis diagram can be divided into two regions in the temperature range from 50 to 550 °C, the first is between 50 and 130 °C, the second between 130 and 550 °C, as shown in Fig. S8. The first region was attributed to the removal of physically bound water. The second weight loss mainly resulted from the structural water release due to the partial condensation of  $\text{HPO}_4$  groups. From the TGA spectrum of PEG, it was obvious that the decomposition of PEG was included in the second region from 170 to 400 °C. A slightly increased mass loss ratio was obtained, possibly due to the deposition of carbon during the reaction.<sup>S1</sup> The polymer content of SnP-PEG2000 was approximately 4% (Table S8).

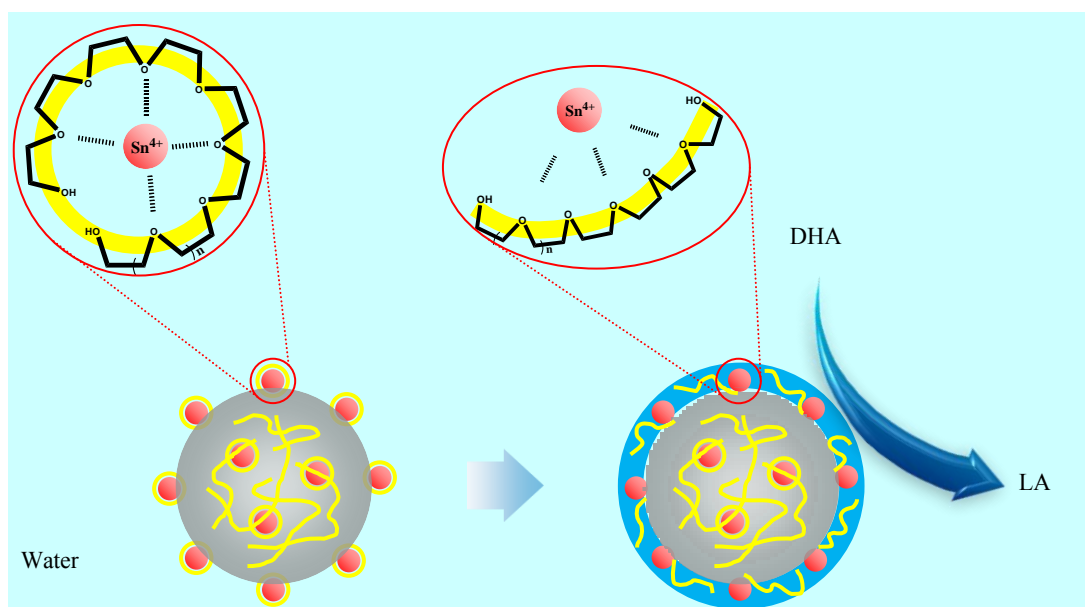

**Scheme S1** Postulated roles of SnP-PEG2000 during the conversion of DHA into LA. ● Solid catalyst; ● Active sites; PEG2000; Organic membrane.

## References

S1. A. I. Bortun, S. A. Khainakov, L. N. Bortun, E. Jaimez, J. R. García and A. Clearfield, *Mater Res Bull*, 1999, 34, 921-932.
